# Supplementary material
Source: Springer Nature journal article supplement (https://www.springermedizin.de/resource/supplementary/13030_2011_97_MOESM1_ESM.pdf/9644732)
Supplement: MOESM1 [file 9644732]

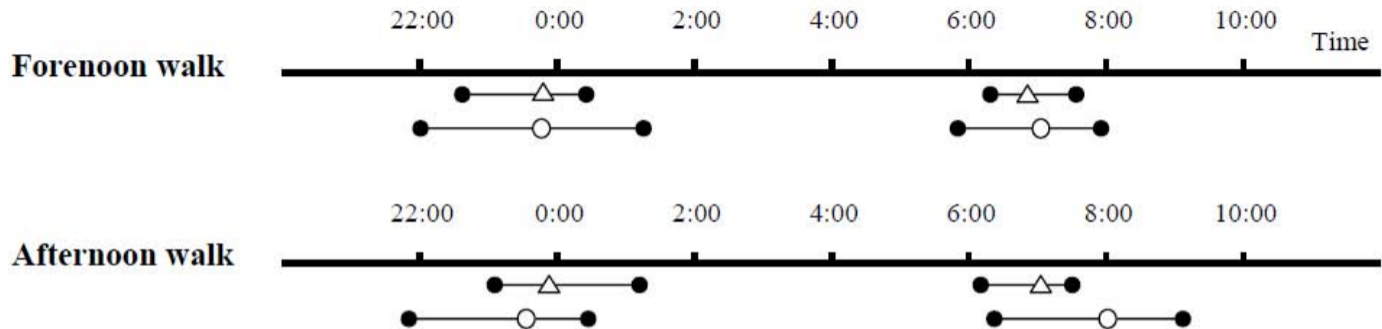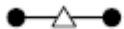

Median and interquartile range in the night before forest walking

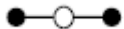

Median and interquartile range in the night after forest walking
